# Supplementary material for: An improved global land cover mapping in 2015 with 30 m resolution (GLC-2015) based on a multi-source product fusion approach
Source: Copernicus journal article supplement (doi:10.5194/essd-2022-142), 2022-08-03
Supplement: Supplementary file 1 [file essd-2022-142-supplement.pdf]

Supplementary material for

# An improved global land cover mapping in 2015 with 30 m resolution (GLC-2015) based on a multi-source product fusion approach

Bingjie Li <sup>1</sup>, Xiaocong Xu <sup>1</sup>, Xiaoping Liu <sup>1</sup>, Qian Shi <sup>1</sup>, Haoming Zhuang <sup>1</sup>, Yaotong Cai <sup>1</sup> and Da He <sup>1</sup>

<sup>1</sup>School of Geography and Planning, Sun Yat-Sen University, Guangzhou, 510275, China

Correspondence to: Xiaoping Liu (liuxp3@mail.sysu.edu.cn)

**Table S1. Relationship between our classification system and the classification systems of the three GLC products.**

| Id | GLC-2015 | Globeland30     | FROM_GLC             | GLC_FCS30                                 |
|----|----------|-----------------|----------------------|-------------------------------------------|
| 10 | Cropland | Cultivated land | Rice paddy           | Rain-fed cropland                         |
|    |          |                 | Greenhouse           | Herbaceous cover                          |
|    |          |                 | Other/orchard        | Tree or shrub cover (orchard)             |
|    |          |                 | Bare farmland        | Irrigated cropland                        |
| 20 | Forest   | Forest          | Broadleaf, leaf-on   | Evergreen broadleaved forest              |
|    |          |                 | Broadleaf, leaf-off  | Open/closed deciduous broadleaved forest  |
|    |          |                 | Needleleaf, leaf-on  | Open/closed evergreen needleleaved forest |
|    |          |                 | Needleleaf, leaf-off | Open/closed deciduous needleleaved forest |
|    |          |                 | Mixed leaf, leaf-on  | Mixed leaf forest                         |
|    |          |                 | Mixed leaf, leaf-off |                                           |

|     |                        |                        |                     |                                        |
|-----|------------------------|------------------------|---------------------|----------------------------------------|
| 30  | Grassland              | Grassland              | Pasture             | Grassland                              |
|     |                        |                        | Natural grassland   |                                        |
|     |                        |                        | Grassland, leaf-off |                                        |
| 40  | Shrubland              | Shrubland              | Shrubland, leaf-on  | Evergreen shrubland                    |
|     |                        |                        | Shrubland, leaf-off | Deciduous shrubland                    |
| 50  | Wetland                | Wetland                | Marshland           | Wetlands                               |
|     |                        |                        | Mudflat             |                                        |
|     |                        |                        | Marshland, leaf-off |                                        |
| 60  | Water bodies           | Water bodies           | Water               | Water                                  |
| 70  | Tundra                 | Tundra                 | Shrub and brush     |                                        |
|     |                        |                        | tundra              |                                        |
|     |                        |                        | Herbaceous tundra   | Lichens and mosses                     |
| 80  | Impervious surfaces    | Artificial surfaces    | Impervious surfaces | Impervious surfaces                    |
| 90  | Bare land              | Bare land              | Bare land           | Sparse shrubland                       |
|     |                        |                        |                     | Sparse herbaceous cover                |
|     |                        |                        |                     | Consolidated/unconsolidated bare areas |
| 100 | Permanent snow and ice | Permanent snow and ice | snow and ice        | Permanent snow and ice                 |

**Table S2. Information of Ecological Zone and its abbreviation across the globe.**

| Domain      | Ecological Zone          |              |
|-------------|--------------------------|--------------|
| Name        | Name                     | Abbreviation |
| Tropical    | Tropical rainforest      | TAr          |
|             | Tropical desert          | TBWh         |
|             | Tropical moist forest    | Tawa         |
|             | Tropical dry forest      | TAWb         |
|             | Tropical shrubland       | TBSh         |
|             | Tropical mountain system | TM           |
| Subtropical | Subtropical humid forest | SCf          |
|             | Subtropical dry forest   | SCs          |

|           |                              |       |
|-----------|------------------------------|-------|
|           | Subtropical desert           | SBWh  |
|           | Subtropical steppe           | SBSH  |
|           | Subtropical mountain system  | SM    |
|           | Temperate oceanic forest     | TeDo  |
|           | Temperate continental forest | TeDc  |
| Temperate | Temperate mountain system    | TeM   |
|           | Temperate steppe             | TeBSK |
|           | Temperate desert             | TeBWk |
| Boreal    | Boreal coniferous forest     | Ba    |
|           | Boreal mountain system       | BM    |
|           | Boreal tundra woodland       | Bb    |
| Polar     | Polar                        | P     |
| Water     | Water                        | Water |

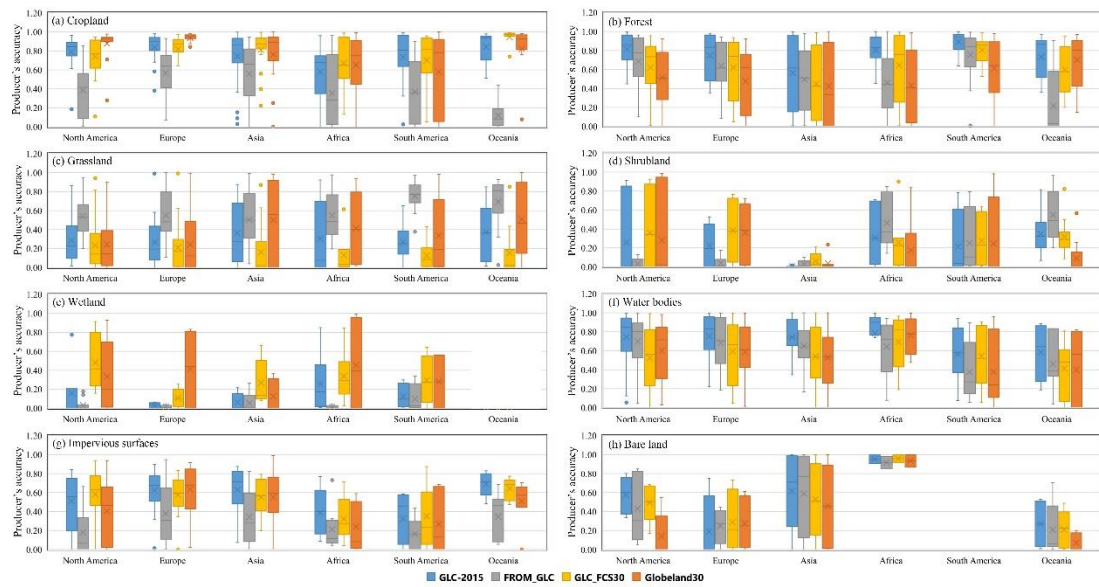

**Figure S1. The box-plot of the producers' accuracy of various LC classes for different continents.**

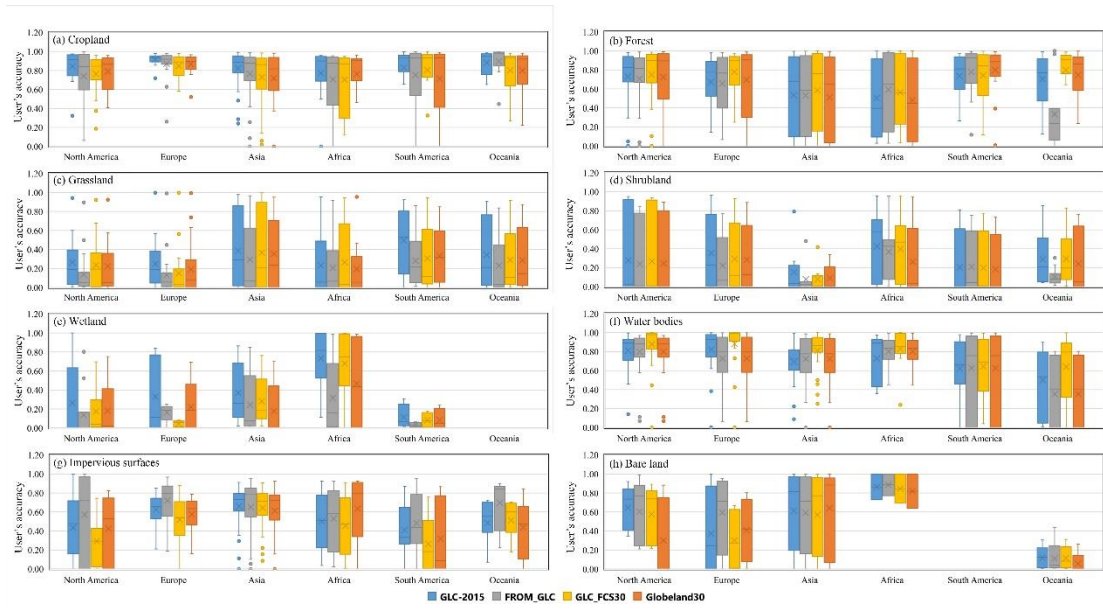

**Figure S2. The box-plot of the users' accuracy of various LC classes for different continents.**
